# Supplementary material
Source: PubMed Central journal article supplement (PMC3932898)
Supplement: 1313083111_pnas.201313083SI.pdf [file 1313083111_pnas.201313083SI.pdf]

# Supporting Information

Cheng et al. 10.1073/pnas.1313083111

Simulation of EI model: Order = 1

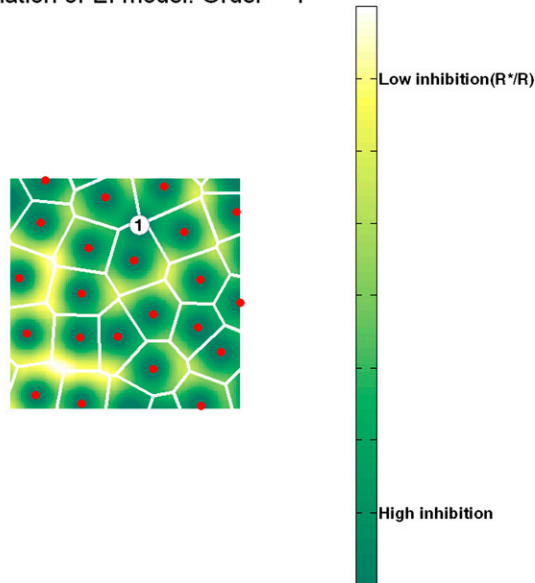

**Movie S1.** This movie shows the simulation process of EI model in predicting the positions and birth time of new hair follicles. The initial condition of inhibitor was determined by the coordinates of the primary hair follicles detected in the sample image, shown as red solid circles. The lines and the solid circles in white color represented the Voronoi boundaries and the predicted hair follicles with numbers indicating their birth time. The intensity of yellow and green in the heatmap reflected the high and the low ratio of  $R^*/R$  respectively. The cross signs indicated the positions of the local minimum of inhibitor  $R$  in the grid where new follicles were to be generated as the embryo skin expanded further.

[Movie S1](#)

Testing of EI model: Time = 3

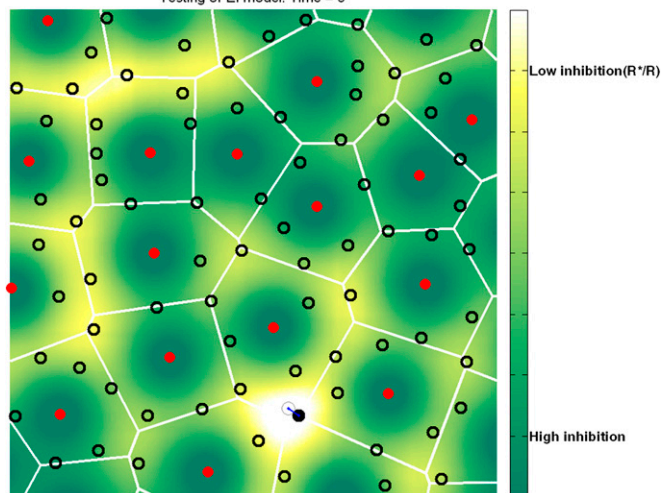

**Movie S2.** This movie shows the evaluation process of EI model in predicting the positions of secondary hair follicles. The red solid circles and the white lines indicated the locations of the primary hair follicles and the Voronoi boundaries. The black open circles represented the secondary hair follicles observed in the sample image. The white open circles indicated the predicted secondary hair follicles by using EI model. The predicted follicle was matched with an observed one if they were co-located mutual nearest neighbors. They were 'married' and shown as solid black and white circles and removed from subsequent matching procedure.

[Movie S2](#)

## Other Supporting Information Files

[SI Appendix \(PDF\)](#)
